# Supplementary material
Source: publisher figshare collection journal article supplement (https://tandf.figshare.com/articles/dataset/_/5802762)
Supplement: Supplementary file 2 [file 1]

Archive with 2 entries (2 files):
- supplementary_GSCS14256889.pdf
- supplementary_GSCS14256889.tex
