# Supplementary material
Source: publisher figshare collection journal article supplement (https://tandf.figshare.com/articles/dataset/_/5802762)
Supplement: Supplementary file 2 [file 1 › supplementary_GSCS14256889.tex]

\documentclass[12pt]{article}
\usepackage{geometry}                % See geometry.pdf to learn the layout options. There are lots.
%\geometry{a4paper}                   % ... or a4paper or a5paper or letterpaper...
%\geometry{landscape}                % Activate for for rotated page geometry
%\usepackage[parfill]{parskip}    % Activate to begin paragraphs with an empty line rather than an indent
\usepackage{graphicx}
\usepackage{amssymb}
\usepackage{amsmath,amssymb,amsthm}
\usepackage{bm}
\usepackage{color}
\usepackage{hyperref}
\usepackage{amsfonts}
\usepackage{multirow}
\usepackage{rotating}
\usepackage{xcolor}
\usepackage{epstopdf}
\DeclareGraphicsRule{.tif}{png}{.png}{`convert #1 `dirname #1`/`basename #1 .tif`.png}

\title{Supplement to ``Sufficient dimension reduction and prediction through cumulative slicing PFC"}
\author{Xinyi Xu $^\dagger$, Xiangjie Li$^\dagger$,Jingxiao Zhang$^\dagger$\footnote{Corresponding author. Email: zhjxiaoruc@163.com}\\
~\\
$\dagger$Center for Applied Statistics, School of Statistics, Renmin University \\
of China, Beijing 100872, China.}

%\date{}                                           % Activate to display a given date or no date


\newtheorem{theo}{Theorem}%%\newtheorem{theo}{Theorem}[section]
\newtheorem{lem}{lemma}
\newtheorem{propo}{proposition}


\begin{document}
\maketitle{}
\newcommand{\s}{\mathcal{\bm S}}
\linespread{1.4}
\begin{lem}\label{lemma1}
Under the normal inverse model (1) in the article, let $R(\mathbf{X})=\mathbf{\Gamma}^T\mathbf{\Delta}^{-1}\mathbf{X}$. Then $R(\mathbf{X})$ is the minimal sufficient linear reduction.
\end{lem}

The detailed proof of lemma \ref{lemma1} has been given by Cook and Forzani (2008)\cite{Cook & F 2009b}. The goal consequently turns to estimate $\mathbf{\Delta}^{-1}\mathcal{S}_\mathbf{\Gamma}=\{\mathbf{\Delta}^{-1}\mathbf{z}:\mathbf{z}\in \mathcal{S}_\mathbf{\Gamma}\}$ under the CUPFC model.\\


The proof of Proposition 3.1:
\begin{proof}\label{proof:1}
Under the CUPFC model the full parameter space is $(\bm{\mu}, \mathcal{S}_\mathbf{\Gamma}, \bm{\beta}, \mathbf{\Delta})$. When we derive the MLE of these parameters we set $d$ fixed and the selection of $d$ deserves separate discussion.

Given a specific $\tilde{y}\in \mathbb{R}$ as the parameter in the model for $\mathbf{X}_{y}$, we have the conditional model
\begin{equation}
\nonumber \begin{aligned}
\mathbf{X}_{y}
  =\bm{\mu}+\mathbf{\Gamma}\bm{\beta}_{\tilde{y}}\{I(y\leq\tilde{y})-Pr(Y\leq\tilde{y})\}+\bm{\varepsilon}.
\end{aligned}
\end{equation}
Then for specific $y\in S_Y$, use the centered $f_{y;\tilde{y}}$ to stand for $I(y\leq\tilde{y})-Pr(Y\leq\tilde{y})$ and $\mathbf{X}_{y}$ is presented as:
\begin{equation}
\nonumber \begin{aligned}
\mathbf{X}_{y}
  =\bm{\mu}+\mathbf{\Gamma}\bm{\beta}_{\tilde{y}}f_{y;\tilde{y}}+\bm{\varepsilon}.
\end{aligned}
\end{equation}

Given a group of observed response $S=(y_1,y_2,...,y_n)$, the joint probability density function of $\mathbf{X}_{y}$, $y\in S$ is:
\begin{equation}
\nonumber \begin{aligned}
g(\mathbf{X}_{y}:y\in S)
  =&(2\pi)^{-\frac{np}{2}}|\mathbf{\Delta}|^{-\frac{n}{2}}\exp\Big\{-\frac{1}{2}\sum\limits_y
  \Big(\mathbf{X}_{y}-\bm{\mu}-\mathbf{\Gamma}\bm{\beta}_{\tilde{y}}f_{y;\tilde{y}}\Big)^T\\
  &\cdot\mathbf{\Delta}^{-1}\Big(\mathbf{X}_{y}-\bm{\mu}-\mathbf{\Gamma}\bm{\beta}_{\tilde{y}}f_{y;\tilde{y}}\Big)\Big\},
\end{aligned}
\end{equation}
as $\mathbf{X}_{y}$ for different $y_1,...,y_n$ are independent but not identically distributed.

The full log likelihood for $\mathbf{X}_{y}$ is��
\begin{equation}\label{eq:1}
 \begin{aligned}
L_{\tilde{y}}(\bm{\mu},\mathcal{S}_\mathbf{\Gamma},\bm{\beta},\mathbf{\Delta})
  =&-\frac{np}{2}\log(2\pi)-\frac{n}{2}\log|\mathbf{\Delta}|\\
  &-\frac{1}{2}\sum\limits_y\Big(\mathbf{X}_{y}-\bm{\mu}-\mathbf{\Gamma}\bm{\beta}_{\tilde{y}}f_{y;\tilde{y}}\Big)^T
  \mathbf{\Delta}^{-1}\Big(\mathbf{X}_{y}-\bm{\mu}-\mathbf{\Gamma}\bm{\beta}_{\tilde{y}}f_{y;\tilde{y}}\Big).
\end{aligned}
\end{equation}
For fixed $\mathbf{\Delta}$ and $\mathbf{\Gamma}$, equation (\ref{eq:1}) is maximized over $\bm{\mu}$ by $\hat{\bm{\mu}}=\bar{\mathbf{X}}$.
Brought in $\hat{\bm{\mu}}=\bar{\mathbf{X}}$, note a conversion technique that
\begin{equation}
\nonumber \begin{aligned}
&\sum\limits_y\Big(\mathbf{X}_{y}-\bm{\mu}-\mathbf{\Gamma}\bm{\beta}_{\tilde{y}}f_{y;\tilde{y}}\Big)^T
  \mathbf{\Delta}^{-1}\Big(\mathbf{X}_{y}-\bm{\mu}-\mathbf{\Gamma}\bm{\beta}_{\tilde{y}}f_{y;\tilde{y}}\Big)\\
  &=\text{trace}\Big\{\mathbf{\Delta}^{-1/2}\Big(\mathbb{X}-\mathbb{F}_{\tilde{y}}\bm{\beta}_{\tilde{y}}^T\mathbf{\Gamma}^T\Big)^T
  \Big(\mathbb{X}-\mathbb{F}_{\tilde{y}}\bm{\beta}_{\tilde{y}}^T\mathbf{\Gamma}^T\Big)\mathbf{\Delta}^{-1/2}\Big\},
\end{aligned}
\end{equation}
where $\mathbb{X}$ is the $n\times p$ matrix with rows $(\mathbf{X}_{y_i}-\bar{\mathbf{X}})^T$ which is $(\mathbf{X}_{i}-\bar{\mathbf{X}})^T$ actually, $\mathbb{F}_{\tilde{y}}$ is an $n\times1$ matrix with the $k$th element $f_{y_k;\tilde{y}}$ ($k=1,...,n$) and $\bm{\beta}_{\tilde{y}}$ is a $d\times1$ matrix whose elements only depend on the specific $\tilde{y}$.

Then we have
\begin{equation}
 \begin{aligned}
L_{\tilde{y}}(\bm{\mu},\mathcal{S}_\mathbf{\Gamma},\bm{\beta},\mathbf{\Delta})
  =&-\frac{np}{2}\log(2\pi)-\frac{n}{2}\log|\mathbf{\Delta}|\\
  &-\frac{1}{2}\text{trace}\Big\{\mathbf{\Delta}^{-1/2}\Big(\mathbb{X}-\mathbb{F}_{\tilde{y}}\bm{\beta}_{\tilde{y}}^T\mathbf{\Gamma}^T\Big)^T
  \Big(\mathbb{X}-\mathbb{F}_{\tilde{y}}\bm{\beta}_{\tilde{y}}^T\mathbf{\Gamma}^T\Big)\mathbf{\Delta}^{-1/2}\Big\}.
\end{aligned}\label{eq:2}
\end{equation}

For fixed $\mathbf{\Delta}$ and $\mathbf{\Gamma}$, equation (\ref{eq:2}) is maximized over $\bm{\beta}_{\tilde{y}}$ by $\hat{\bm{\beta}}_{\tilde{y}}=\mathbf{\Gamma}^T\mathbf{P}_{\mathbf{\Gamma}(\mathbf{\Delta}^{-1})}\hat{\mathbf{B}}_{\tilde{y}}$, where $\mathbf{P}_{\mathbf{\Gamma}(\mathbf{\Delta}^{-1})}=\mathbf{\Gamma}(\mathbf{\Gamma}^T\mathbf{\Delta}^{-1}\mathbf{\Gamma})^{-1}\mathbf{\Gamma}^T\mathbf{\Delta}^{-1}$ is the projection onto $\mathcal{S}_{\mathbf{\Gamma}}$ in the $\mathbf{\Delta}^{-1}$ inner product and $\hat{\mathbf{B}}_{\tilde{y}}=\mathbb{X}^T\mathbb{F}_{\tilde{y}}(\mathbb{F}_{\tilde{y}}^T\mathbb{F}_{\tilde{y}})^{-1}$ with $\mathbb{F}_{\tilde{y}}$'s $k$th coordinate being $f_{y_k;\tilde{y}}$. $\hat{\mathbf{B}}_{\tilde{y}}$ is obviously the coefficient matrix from the multivariate OLS regression of $\mathbf{X}$ on $f_{\tilde{y}}$ (Cook \& Forzani 2008)\cite{Cook & F 2009b}. Pay attention that we usually set $\mathbf{\Gamma}\in \mathbb{R}^{p\times d}$ an orthonormal basis of $\mathcal{S}_\mathbf{\Gamma}$ without loss of generality, so the MLE $\mathbf{\Gamma}\hat{\bm{\beta}}_{\tilde{y}}$ will be $\mathbf{P}_{\mathbf{\Gamma}(\mathbf{\Delta}^{-1})}\hat{\mathbf{B}}_{\tilde{y}}$. We then substitute $\hat{\bm{\mu}}$ and $\hat{\bm{\beta}}_{\tilde{y}}$ into the log likelihood $L_{\tilde{y}}(\bm{\mu},\mathcal{S}_\mathbf{\Gamma},\bm{\beta},\mathbf{\Delta})$ to attain the MLE of $\mathcal{S}_\mathbf{\Gamma}$ and $\mathbf{\Delta}$.

Notice that
\begin{equation}
\nonumber \Big(\mathbb{X}-\mathbb{F}_{\tilde{y}}\hat{\bm{\beta}}_{\tilde{y}}^T\mathbf{\Gamma}^T\Big)^T
  \Big(\mathbb{X}-\mathbb{F}_{\tilde{y}}\hat{\bm{\beta}}_{\tilde{y}}^T\mathbf{\Gamma}^T\Big)
=\mathbb{X}^T\mathbb{X}-\mathbf{P}_{\mathbf{\Gamma}(\mathbf{\Delta}^{-1})}\mathbb{X}^T\mathbb{F}_{\tilde{y}}(\mathbb{F}_{\tilde{y}}^T\mathbb{F}_{\tilde{y}})^{-1}\mathbb{F}_{\tilde{y}}^T\mathbb{X},
\end{equation}
and
\begin{equation}
\nonumber \mathbf{\Delta}^{-1/2}\mathbf{P}_{\mathbf{\Gamma}(\mathbf{\Delta}^{-1})}=\mathbf{P}_{\mathbf{\Delta}^{-1/2}\mathbf{\Gamma}}\mathbf{\Delta}^{-1/2},
\end{equation}
where we write $\mathbf{P}_\mathbf{G}=\mathbf{G}(\mathbf{G}^T\mathbf{G})^{-1}\mathbf{G}^T$ for a full rank matrix $\mathbf{G}$.
We can easily obtain that
\begin{equation}
\nonumber \begin{aligned}
 &\mathbf{\Delta}^{-1/2}\Big(\mathbb{X}-\mathbb{F}_{\tilde{y}}\hat{\bm{\beta}}_{\tilde{y}}^T\mathbf{\Gamma}^T\Big)^T
  \Big(\mathbb{X}-\mathbb{F}_{\tilde{y}}\hat{\bm{\beta}}_{\tilde{y}}^T\mathbf{\Gamma}^T\Big)\mathbf{\Delta}^{-1/2}\\
=&n\Big(\mathbf{\Delta}^{-1/2}\hat{\mathbf{\Sigma}}\mathbf{\Delta}^{-1/2}-\mathbf{P}_{\mathbf{\Delta}^{-1/2}\mathbf{\Gamma}}\mathbf{\Delta}^{-1/2}\{\mathbb{X}^T\mathbf{P}_{\mathbb{F}_{\tilde{y}}}\mathbb{X}/n\}\mathbf{\Delta}^{-1/2}\Big),
\end{aligned}
\end{equation}
and
\begin{equation}
\nonumber \begin{aligned}
L_{\tilde{y}}(\mathcal{S}_{\mathbf{\Gamma}},\mathbf{\Delta})
  =&-\frac{np}{2}\log(2\pi)-\frac{n}{2}\log|\mathbf{\Delta}|\\
  &-\frac{n}{2}\text{trace}\Big\{\mathbf{\Delta}^{-1/2}\hat{\mathbf{\Sigma}}\mathbf{\Delta}^{-1/2}-\mathbf{P}_{\mathbf{\Delta}^{-1/2}\mathbf{\Gamma}}\mathbf{\Delta}^{-1/2}\{\mathbb{X}^T\mathbf{P}_{\mathbb{F}_{\tilde{y}}}\mathbb{X}/n\}\mathbf{\Delta}^{-1/2}\Big\}.
\end{aligned}
\end{equation}

If $\tilde{y}$ takes value from $\{\tilde{y}_1,\tilde{y}_2,...,\tilde{y}_m\}$, we can consider the integration of all the log likelihood functions $L_{\tilde{y}_i}(\mathcal{S}_{\mathbf{\Gamma}},\mathbf{\Delta})$, $i=1,...,m$, to maximize the weighted average
\begin{equation}
\nonumber \begin{aligned}
\bar{L}(\mathcal{S}_{\mathbf{\Gamma}},\mathbf{\Delta})
  =\frac{1}{m}\sum\limits_{i=1}^m\omega(\tilde{y}_i)L_{\tilde{y}_i}(\mathcal{S}_{\mathbf{\Gamma}},\mathbf{\Delta}),
\end{aligned}
\end{equation}
where $\omega(\cdot)/m$ is a nonnegative weight function with respect to $\tilde{y}_i$. Then the goal is to maximize
\begin{equation}
\nonumber \begin{aligned}
\bar{L}(\mathcal{S}_{\mathbf{\Gamma}},\mathbf{\Delta})
   =&-\frac{np}{2}\log(2\pi)-\frac{n}{2}\log|\mathbf{\Delta}|\\
  &-\frac{n}{2}\text{trace}\Big\{\mathbf{\Delta}^{-1/2}\hat{\mathbf{\Sigma}}\mathbf{\Delta}^{-1/2}
  -\mathbf{P}_{\mathbf{\Delta}^{-1/2}\mathbf{\Gamma}}\mathbf{\Delta}^{-1/2}\frac{1}{m}\sum\limits_{i=1}^m
  \left\{\omega(\tilde{y}_i)\mathbb{X}^T\mathbf{P}_{\mathbb{F}_{\tilde{y}_i}}\mathbb{X}/n\right\}\mathbf{\Delta}^{-1/2}\Big\}\\
  =&-\frac{np}{2}\log(2\pi)-\frac{n}{2}\log|\mathbf{\Delta}|\\
  &-\frac{n}{2}\text{trace}\Big\{\mathbf{\Delta}^{-1/2}\hat{\mathbf{\Sigma}}\mathbf{\Delta}^{-1/2}
  -\mathbf{P}_{\mathbf{\Delta}^{-1/2}\mathbf{\Gamma}}\mathbf{\Delta}^{-1/2}\hat{\mathbf{\Sigma}}_{cu}\mathbf{\Delta}^{-1/2}\Big\}.
\end{aligned}
\end{equation}

Holding $\mathbf{\Delta}$ fixed, the log likelihood is maximized by choosing $\mathbf{P}_{\mathbf{\Delta}^{-1/2}\mathbf{\Gamma}}$ as the projection onto the space $\text{span}_d(\mathbf{\Delta}^{-1/2}\hat{\Sigma}_{cu}\mathbf{\Delta}^{-1/2})$, where $\text{span}_d(\mathbf{A})$ denotes the space spanned by the first $d$ eigenvectors of $\mathbf{A}$. It means that the span of $\mathbf{\Delta}^{-1}\mathbf{\Gamma}$ is the span of $\mathbf{\Delta}^{-1/2}$ times the first $d$ eigenvectors of $\mathbf{\Delta}^{-1/2}\hat{\Sigma}_{cu}\mathbf{\Delta}^{-1/2}$, which is $\mathcal{S}_d(\mathbf{\Delta}, \hat{\mathbf{\Sigma}}_{cu})$ exactly. The subspace $\mathcal{S}_d(\mathbf{\Delta}, \hat{\mathbf{\Sigma}}_{cu})$ can also be described as the span of $\mathbf{\Delta}^{-1}$ times the first $d$ eigenvectors of $\hat{\mathbf{\Sigma}}_{cu}$ (Adragni \& Cook 2009)\cite{A and Cook 2009}.

This leads to the final maximized log likelihood for $\mathbf{\Delta}$
\begin{equation}
\nonumber
\bar{L}(\mathbf{\Delta})
  =-\frac{np}{2}\log(2\pi)-\frac{n}{2}\log|\mathbf{\Delta}|
  -\frac{n}{2}\text{trace}\{\mathbf{\Delta}^{-1}\hat{\mathbf{\Sigma}}_{res}\}-\frac{n}{2}\sum\limits_{i=d+1}^p\lambda_i(\mathbf{\Delta}^{-1}\hat{\mathbf{\Sigma}}_{cu}),
\end{equation}
where $\hat{\mathbf{\Sigma}}_{res}=\hat{\mathbf{\Sigma}}-\hat{\mathbf{\Sigma}}_{cu}$ and $\lambda_i(\mathbf{A})$ denotes the $i$th eigenvalue of $\mathbf{A}$.

Thus the MLEs of all the dimension reduction parameters are $\hat{\bm{\mu}}=\bar{\mathbf{X}}$, $\hat{\mathbf{\Delta}}^{-1}\hat{\mathcal{S}}_\mathbf{\Gamma}=\mathcal{S}_d(\hat{\mathbf{\Delta}},\hat{\mathbf{\Sigma}}_{cu})$, $\hat{\bm{\beta}}_{\tilde{y}}=(\hat{\mathbf{\Gamma}}^T\hat{\mathbf{\Delta}}^{-1}\hat{\mathbf{\Gamma}})^{-1}\hat{\mathbf{\Gamma}}^T\hat{\mathbf{\Delta}}^{-1}\hat{\mathbf{B}}_{\tilde{y}}$,
where $\hat{\mathbf{\Gamma}}$ is any orthonormal basis for $\hat{\mathcal{S}}_\mathbf{\Gamma}$, and the $\hat{\mathbf{\Delta}}$ is obtained by maximizing $\bar{L}(\mathbf{\Delta})$.
\end{proof}


The detailed proof of Proposition 3.2 can be referred to
Theorem 3.1 in Cook and Forzani (2008)\cite{Cook & F 2009b}.
%The proof of proposition \ref{prop:3} can be referred to Corollary 3.4 in Cook and Forzani (2008)\cite{Cook & F 2009b}.
 Their conclusion can be directly utilized here since the demonstration process concerns only the form of $L_d(\mathbf{\Delta})$ but not the specific form of $\hat{\mathbf{\Sigma}}_{fit}$ or $\hat{\mathbf{\Sigma}}_{cu}$. The $\bar{L}(\mathbf{\Delta})$ in this article is as the same form as $L_d(\mathbf{\Delta})$ in Cook and Forzani (2008)\cite{Cook & F 2009b}.\\

The proof of Proposition 3.3:
\begin{proof}
From the development of Proposition 3.1, the MLE of $\mathbf{\Delta}^{-1}\mathcal{S}_{\mathbf{\Gamma}}$ is $\mathcal{S}_d(\hat{\mathbf{\Delta}},\hat{\mathbf{\Sigma}}_{cu})$, which establishes the second form.\\
\\

To deduce the third form from the second form we need a lemma.
\begin{lem} \label{lemma2}
Let $\tilde{\mathbf{V}}=\hat{\mathbf{\Sigma}}_{res}^{-1/2}\hat{\mathbf{V}}\mathbf{M}^{1/2}$, where $\mathbf{M}=(\mathbf{I}_p+\hat{\mathbf{K}})^{-1}$, with $\hat{\mathbf{V}}$ and $\hat{\mathbf{K}}$ as in Proposition 3.2. Then $\hat{\mathbf{\Delta}}^{1/2}\tilde{\mathbf{V}}$ are the normalized eigenvectors of $\hat{\mathbf{\Delta}}^{-1/2}\hat{\mathbf{\Sigma}}_{cu}\hat{\mathbf{\Delta}}^{-1/2}$.
\end{lem}
The proof of Lemma \ref{lemma2} can be found in Cook and Forzani (2008)\cite{Cook & F 2009b} which replaces $\hat{\mathbf{\Sigma}}_{cu}$ with $\hat{\mathbf{\Sigma}}_{fit}$ but makes no difference because it concerns only the form of $\hat{\mathbf{\Delta}}$ but not the specific form of $\hat{\mathbf{\Sigma}}_{fit}$ or $\hat{\mathbf{\Sigma}}_{cu}$ in the demonstration process. The form of $\hat{\mathbf{\Delta}}$ in this article is the same as in Cook and Forzani (2008)\cite{Cook & F 2009b}.

Now, from the second form and Lemma \ref{lemma2}, span of the first $d$ columns of $\hat{\mathbf{\Delta}}^{-1/2}\hat{\mathbf{\Delta}}^{1/2}\tilde{\mathbf{V}}=\tilde{\mathbf{V}}$ is the MLE of $\mathbf{\Delta}^{-1}\mathcal{S}_{\mathbf{\Gamma}}$. Since $\tilde{\mathbf{V}}=\hat{\mathbf{\Sigma}}_{res}^{-1/2}\hat{\mathbf{V}}\mathbf{M}^{1/2}$ and $\mathbf{M}$ is diagonal full rank with the first $d$ elements equal to 1, the span of the first $d$ columns of $\tilde{\mathbf{V}}$ is the same of the first $d$ columns of $\hat{\mathbf{\Sigma}}_{res}^{-1/2}\hat{\mathbf{V}}$. $\hat{\mathbf{V}}$ are the eigenvectors of $\hat{\mathbf{\Sigma}}_{res}^{-1/2}\hat{\mathbf{\Sigma}}_{cu}\hat{\mathbf{\Sigma}}_{res}^{-1/2}$, so the span of the first $d$ columns of $\hat{\mathbf{\Sigma}}_{res}^{-1/2}\hat{\mathbf{V}}$ is $\mathcal{S}_d(\hat{\mathbf{\Sigma}}_{res},\hat{\mathbf{\Sigma}}_{cu})$, which proves the third form.\\
\\

The proof of the fourth form follows from the third form and the fact that the eigenvectors of $\hat{\mathbf{\Sigma}}^{-1}\hat{\mathbf{\Sigma}}_{cu}$ and $\hat{\mathbf{\Sigma}}_{res}^{-1}\hat{\mathbf{\Sigma}}_{cu}$ are identical, with corresponding eigenvalues $\hat{\lambda}_i/(1+\hat{\lambda}_i)$ and $\hat{\lambda}_i$, $i=1,...,p$.

Note that for symmetric matrices $\mathbf{A}$ and $\mathbf{B}$, the eigenvalues and eigenvectors of $\mathbf{AB}$ and $\mathbf{A}^{1/2}\mathbf{B}\mathbf{A}^{1/2}$ are identical. Thus with $\hat{\mathbf{v}}_i$ and $\hat{\lambda}_i$ as in Proposition 3.2 we have
\begin{align*}
  \hat{\mathbf{\Sigma}}_{res}^{-1}\hat{\mathbf{\Sigma}}_{cu}\hat{\mathbf{v}}_i=\hat{\lambda}_i\hat{\mathbf{v}}_i & \Leftrightarrow \hat{\lambda}_i^{-1}\hat{\mathbf{\Sigma}}_{cu}\hat{\mathbf{v}}_i=\hat{\mathbf{\Sigma}}_{res}\hat{\mathbf{v}}_i \\
   & \Leftrightarrow (\hat{\lambda}_i^{-1}+1)\hat{\mathbf{\Sigma}}_{cu}\hat{\mathbf{v}}_i=(\hat{\mathbf{\Sigma}}_{res}+\hat{\mathbf{\Sigma}}_{cu})\hat{\mathbf{v}}_i=\hat{\mathbf{\Sigma}}\hat{\mathbf{v}}_i\\
   & \Leftrightarrow \hat{\mathbf{\Sigma}}^{-1}\hat{\mathbf{\Sigma}}_{cu}\hat{\mathbf{v}}_i=\hat{\lambda}_i/(1+\hat{\lambda}_i)\hat{\mathbf{v}}_i.
\end{align*}
The conclusion follows because $\hat{\mathbf{\Sigma}}_{res}=\hat{\mathbf{\Sigma}}-\hat{\mathbf{\Sigma}}_{cu}>0$
and $\hat{\lambda}_i/(1+\hat{\lambda}_i)$ is a strictly monotonic function of $\hat{\lambda}_i$.\\
\\

The proof of the first form follows from the third form and the fact that the eigenvectors of $\hat{\mathbf{\Sigma}}_{res}^{-1}\hat{\mathbf{\Sigma}}$ and $\hat{\mathbf{\Sigma}}_{res}^{-1}\hat{\mathbf{\Sigma}}_{cu}$ are identical, with corresponding eigenvalues $(1+\hat{\lambda}_i)$ and $\hat{\lambda}_i$, $i=1,...,p$.
\begin{align*}
  \hat{\mathbf{\Sigma}}_{res}^{-1}\hat{\mathbf{\Sigma}}_{cu}\hat{\mathbf{v}}_i=\hat{\lambda}_i\hat{\mathbf{v}}_i & \Leftrightarrow \hat{\mathbf{\Sigma}}_{res}^{-1}\hat{\mathbf{\Sigma}}\hat{\mathbf{v}}_i=(\mathbf{I}_p+\hat{\mathbf{\Sigma}}_{res}^{-1}\hat{\mathbf{\Sigma}}_{cu})\hat{\mathbf{v}}_i=(1+\hat{\lambda}_i)\hat{\mathbf{v}}_i
\end{align*}
The conclusion follows because $\hat{\mathbf{\Sigma}}_{res}=\hat{\mathbf{\Sigma}}-\hat{\mathbf{\Sigma}}_{cu}>0$
and $(1+\hat{\lambda}_i)$ is a strictly monotonic function of $\hat{\lambda}_i$.

%The proof of the first form follows from the third form and the fact that $\hat{\mathbf{\Sigma}}=\hat{\mathbf{\Sigma}}_{res}\hat{\mathbf{\Sigma}}_{cu}$. Let $\hat{\mathbf{W}}=(\hat{\mathbf{w}}_1,...,\hat{\mathbf{w}}_p)$ and $\hat{\bm{\alpha}}=\text{diag}({\hat{\alpha}}_1,...,\hat{\alpha}_p)$ be the matrices of the ordered eigenvectors and eigenvalues of $\hat{\mathbf{\Delta}}^{-1}\hat{\mathbf{\Sigma}}_{cu}$.
\end{proof}


The proof of Theorem 3.4:%\vspace{-10pt}
\begin{proof}\label{proof:2}
We study consistency of the estimator $\mathcal{S}_d(\hat{\mathbf{\Sigma}},\hat{\mathbf{\Sigma}}_{cu})$ under the inverse model (1) no matter what the real form of $\mathbf{f}_y$ or the nature of $\bm{\varepsilon}$ is. Since $\mathcal{S}_d(\hat{\mathbf{\Sigma}},\hat{\mathbf{\Sigma}}_{cu})$ is the span of $\hat{\mathbf{\Sigma}}^{-1}$ times the first $d$ eigenvectors of $\hat{\mathbf{\Sigma}}_{cu}$, which equals the span of the first $d$ eigenvectors of $\hat{\mathbf{\Sigma}}^{-1}\hat{\mathbf{\Sigma}}_{cu}$, it is sufficient to consider the property of $\hat{\mathbf{\Sigma}}^{-1}\hat{\mathbf{\Sigma}}_{cu}$.

Under the inverse model $\mathbf{X}_y={\bm{\mu}}+\bm{\Gamma\nu}_y+\bm{\varepsilon}$, the covariance matrix of $\mathbf{X}\in \mathbb{R}^p$ is $\mathbf{\Sigma}=\mathbf{\Gamma}\mathbf{V}\mathbf{\Gamma}^T+\mathbf{\Delta}$, where $\mathbf{V}=\text{var}(\bm{\nu}_Y)$ is positive definite.
Given pre-specified $\tilde{y}_1,\tilde{y}_2,...,\tilde{y}_m$, Define that $$\mathbf{\Sigma}_{cu}=\frac{1}{m}\mathbf{\Sigma}^{1/2}\Big(\text{Corr}(\mathbf{X},f_{Y;{\tilde{y}_1}}),...,\text{Corr}(\mathbf{X},f_{Y;\tilde{y}_m})\Big)
\Big(\text{Corr}(\mathbf{X},f_{Y;\tilde{y}_1}),...,\text{Corr}(\mathbf{X},f_{Y;\tilde{y}_m})\Big)^T\mathbf{\Sigma}^{1/2},$$
 where $\mathbf{X}\in\mathbb{R}^p$ and $f_{Y;\tilde{y}_i}=I(Y\leq \tilde{y}_i)-Pr(Y\leq \tilde{y}_i)$.

It is known that the sample covariance matrix $\hat{\mathbf{\Sigma}}=\mathbb{X}^T\mathbb{X}/n$ is a $\sqrt{n}$-consistent estimator of $\mathbf{\Sigma}$. Hence $\hat{\mathbf{\Sigma}}^{-1}$ is a $\sqrt{n}$-consistent estimator of $\mathbf{\Sigma}^{-1}$ (Cook \& Forzani 2008)\cite{Cook & F 2009b}. Without loss of generality we assume that $\omega(\cdot)=1$, then
\begin{equation}
\nonumber \begin{aligned}
\hat{\bm{\Sigma}}_{cu}=&\frac{1}{m}\sum\limits_{i=1}^{m}\{\mathbb{X}^T\mathbf{P}_{\mathbb{F}_{\tilde{y}_i}}\mathbb{X}/n\}
=\frac{1}{m}\sum\limits_{i=1}^{m}\{\mathbb{X}^T\mathbb{F}_{\tilde{y}_i}(\mathbb{F}_{\tilde{y}_i}^T\mathbb{F}_{\tilde{y}_i})^{-1}\mathbb{F}_{\tilde{y}_i}^T\mathbb{X}/n\}\\
  &=\frac{1}{m}\sum\limits_{i=1}^{m}\left\{\frac{\mathbb{X}^T\mathbb{F}_{\tilde{y}_i}}{n}\big(\frac{\mathbb{F}_{\tilde{y}_i}^T\mathbb{F}_{\tilde{y}_i}}{n}\Big)^{-1}\frac{\mathbb{F}_{\tilde{y}_i}^T\mathbb{X}}{n}\right\}.
\end{aligned}
\end{equation}
As $\mathbb{X}^T\mathbb{F}_{\tilde{y}_i}/n$ is a $\sqrt{n}$-consistent estimator of $\text{cov}(\mathbf{X},f_{Y;\tilde{y}_i})$ and $(\mathbb{F}_{\tilde{y}_i}^T\mathbb{F}_{\tilde{y}_i}/n)^{-1}$ is a $\sqrt{n}$-consistent estimator of var($f_{Y;\tilde{y}_i}$), then
$(\mathbb{X}^T\mathbb{F}_{\tilde{y}_i}/n)(\mathbb{F}_{\tilde{y}_i}^T\mathbb{F}_{\tilde{y}_i}/n)^{-1}(\mathbb{F}_{\tilde{y}_i}^T\mathbb{X}/n)$ converges at $\sqrt{n}$ rate to $\mathbf{\Sigma}^{1/2}\text{Corr}(\mathbf{X},f_{Y;\tilde{y}_i})\text{Corr}(\mathbf{X},f_{Y;\tilde{y}_i})^T\mathbf{\Sigma}^{1/2}$ when $n$ approaches $\infty$ (Cook \& Forzani 2008)\cite{Cook & F 2009b}.

Next we consider the convergence of $\sum\limits_{i=1}^m(\mathbb{X}^T\mathbb{F}_{\tilde{y}_i}/n)(\mathbb{F}_{\tilde{y}_i}^T\mathbb{F}_{\tilde{y}_i}/n)^{-1}(\mathbb{F}_{\tilde{y}_i}^T\mathbb{X}/n)
=\sum\limits_{i=1}^m\hat{\mathbf{\Sigma}}_{\tilde{y}_i}$. As $\forall \epsilon >0$, $\forall i\in\{1,...,m\}$,
\begin{equation}
  \nonumber\begin{aligned}
  P\Big(\Big|\hat{\mathbf{\Sigma}}_{\tilde{y}_i}-\mathbf{\Sigma}^{1/2}\text{Corr}(\mathbf{X},f_{Y;\tilde{y}_i})\text{Corr}(\mathbf{X},f_{Y;\tilde{y}_i})^T\mathbf{\Sigma}^{1/2}\Big|<\epsilon\Big)
  \rightarrow 1,
\end{aligned}
\end{equation}
we can conclude that
\begin{equation}
  \nonumber\begin{aligned}
  &P\Big(\frac{1}{m}\Big|\sum\limits_{i=1}^m\hat{\mathbf{\Sigma}}_{\tilde{y}_i}-\sum\limits_{i=1}^m\mathbf{\Sigma}^{1/2}\text{Corr}(\mathbf{X},f_{Y;\tilde{y}_i})\text{Corr}(\mathbf{X},f_{Y;\tilde{y}_i})^T\mathbf{\Sigma}^{1/2}\Big|<\epsilon\Big)\\
  \geq& P\Big(\frac{1}{m}\sum\limits_{i=1}^m\Big|\hat{\mathbf{\Sigma}}_{\tilde{y}_i}-\mathbf{\Sigma}^{1/2}\text{Corr}(\mathbf{X},f_{Y;\tilde{y}_i})\text{Corr}(\mathbf{X},f_{Y;\tilde{y}_i})^T\mathbf{\Sigma}^{1/2}\Big|<\epsilon\Big)\\
  \geq&P\Big(\forall i\in\{1,...,m\},\Big|\hat{\mathbf{\Sigma}}_{\tilde{y}_i}-\mathbf{\Sigma}^{1/2}\text{Corr}(\mathbf{X},f_{Y;\tilde{y}_i})\text{Corr}(\mathbf{X},f_{Y;\tilde{y}_i})^T\mathbf{\Sigma}^{1/2}\Big|<\epsilon\Big)\\
  =&P\Big(\max\limits_i\Big|\hat{\mathbf{\Sigma}}_{\tilde{y}_i}-\mathbf{\Sigma}^{1/2}\text{Corr}(\mathbf{X},f_{Y;\tilde{y}_i})\text{Corr}(\mathbf{X},f_{Y;\tilde{y}_i})^T\mathbf{\Sigma}^{1/2}\Big|<\epsilon\Big)
  \rightarrow 1,
\end{aligned}
\end{equation}
as $n\rightarrow\infty$.
Thus $\hat{\mathbf{\Sigma}}_{cu}$ converges to $\mathbf{\Sigma}_{cu}$ at rate not less than $\sqrt{n}$ since $\mathbf{\Sigma}_{\tilde{y}_i}$ is $\sqrt{n}$-consistent.

Combined with model (2) in the article we have
\begin{equation}
\nonumber\begin{aligned}
\text{corr}(\mathbf{X},f_{Y;\tilde{y}_i})=&\mathbf{\Sigma}^{-1/2}\text{Cov}(\bm{\mu}+\mathbf{\Gamma}\bm{\nu}_Y+\bm{\varepsilon},f_{Y;\tilde{y}_i})
\text{var}(f_{Y;\tilde{y}_i})^{-1/2}\\
=&\mathbf{\Sigma}^{-1/2}\mathbf{\Gamma}\text{Cov}(\bm{\nu}_Y,f_{Y;\tilde{y}_i})\text{var}(f_{Y;\tilde{y}_i})^{-1/2}\\
=&\mathbf{\Sigma}^{-1/2}\mathbf{\Gamma}\mathbf{V}^{1/2}\text{Corr}(\bm{\nu}_Y,f_{Y;\tilde{y}_i}).
\end{aligned}
\end{equation}
$\hat{\mathbf{\Sigma}}^{-1}\hat{\mathbf{\Sigma}}_{cu}$ therefore converges to
\begin{equation}
\nonumber\begin{aligned}
\mathbf{\Sigma}^{-1}\mathbf{\Sigma}_{cu}=&\frac{1}{m}\mathbf{\Sigma}^{-1}\mathbf{\Gamma V}^{1/2}\mathbf{CC}^T\mathbf{V}^{1/2}\mathbf{\Gamma}^T\\
=&\frac{1}{m}(\mathbf{\Gamma V\Gamma}+\mathbf{\Delta})^{-1}\mathbf{\Gamma V}^{1/2}\mathbf{CC}^T\mathbf{V}^{1/2}\mathbf{\Gamma}^T.
\end{aligned}
\end{equation}
at not-less-than $\sqrt{n}$ rate, and as a result the first $d$ eigenvectors of $\hat{\mathbf{\Sigma}}^{-1}\hat{\mathbf{\Sigma}}_{cu}$ converge at not-less-than $\sqrt{n}$ rate to the corresponding eigenvectors of $\mathbf{\Sigma}^{-1}\mathbf{\Sigma}_{cu}$.

Now we focus on the relationship between $\mathbf{\Sigma}^{-1}\mathbf{\Sigma}_{cu}$ and $\mathbf{\Delta}^{-1}\mathcal{S}_\mathbf{\Gamma}$. Based on
\begin{equation}
\nonumber (\mathbf{\Gamma}\mathbf{V}\mathbf{\Gamma}^T+\mathbf{\Delta})^{-1}=\mathbf{\Delta}^{-1}-\mathbf{\Delta}^{-1}\mathbf{\Gamma}
(\mathbf{V}^{-1}+\mathbf{\Gamma}^T\mathbf{\Delta}^{-1}\mathbf{\Gamma})^{-1}\mathbf{\Gamma}^T\mathbf{\Delta}^{-1},
\end{equation}
we simplify $\mathbf{\Sigma}^{-1}\mathbf{\Sigma}_{cu}$ as
\begin{equation}
\nonumber \mathbf{\Sigma}^{-1}\mathbf{\Sigma}_{cu}=\frac{1}{m}\mathbf{\Delta}^{-1}\mathbf{\Gamma K}\mathbf{V}^{1/2}\mathbf{CC}^T\mathbf{V}^{1/2}\mathbf{\Gamma}^T,
\end{equation}
where $\mathbf{K}=(\mathbf{V}^{-1}+\mathbf{\Gamma}^T\mathbf{\Delta}^{-1}\mathbf{\Gamma})^{-1}\mathbf{V}^{-1}$ is a full rank $d\times d$ matrix. Clearly $\text{span}(\mathbf{\Sigma}^{-1}\mathbf{\Sigma}_{cu})\subseteq \mathbf{\Delta}^{-1}\mathcal{S}_\mathbf{\Gamma}$ with equality if and only if the rank of $\mathbf{\Gamma K}\mathbf{V}^{1/2}\mathbf{CC}^T\mathbf{V}^{1/2}\mathbf{\Gamma}^T$ is equal to $d$. Since $\mathbf{\Gamma}\in \mathbb{R}^{p\times d}$ has full column rank and both $\mathbf{K}$ and $\mathbf{V}$ is a full rank matrix, the rank of $\mathbf{\Gamma K}\mathbf{V}^{1/2}\mathbf{CC}^T\mathbf{V}^{1/2}\mathbf{\Gamma}^T$ is equal to $d$ if and only if the rank of $\mathbf{CC}^T$ is equal to $d$, which requires that $\mathbf{C}$ has rank $d$.
\end{proof}

\begin{thebibliography}{11}
%\expandafter\ifx\csname
%natexlab\endcsname\relax\def\natexlab#1{#1}\fi
%\expandafter\ifx\csname url\endcsname\relax
%  \def\url#1{\texttt{#1}}\fi
%\expandafter\ifx\csname urlprefix\endcsname\relax\def\urlprefix{URL
%}\fi
%\newcommand{\enquote}[1]{``#1''}
\newcommand{\enquote}[1]{#1}

\bibitem{A and Cook 2009}%2
Adragni, K. P. and Cook, R. D. \enquote{Sufficient Dimension Reduction and Prediction in Regression.} \textit{Philosophical Transaction of the Royal Society A}, 2009, 367(1906):4385--4405.

\bibitem{Cook & F 2009b}%12
Cook, R. D. and Forzani, L.  \enquote{Principal fitted components for dimension reduction in regression.} \textit{Statistical Science}, 2008, 23(4):485--501.

\end{thebibliography}
\end{document}
